# Supplementary material for: EDTA-functionalized hierarchical porous microspheres for effective cobalt ion recovery from water
Source: Royal Society of Chemistry journal article supplement (doi:10.1039/d4ma00601a), 2024-01-01
Supplement: d4ma00601a1.pdf [file d4ma00601a1.pdf]

## Supporting Information

### **Hierarchical porous microspheres for Co(II) recovery**

Mao-Hsuan Peng and Chia-Chen Li\*

Department of Materials Science and Engineering, National Tsing Hua University, Hsinchu 30013,  
Taiwan

\*E-mail: [cc.li@mx.nthu.edu.tw](mailto:cc.li@mx.nthu.edu.tw)

## Supplementary Tables

**Table S1** Schemes and parameters adopted in the DFT calculations using DMol<sup>3</sup>.

| Electronic Hamiltonian                | Scheme                                                     | Condition and Parameter                                                |
|---------------------------------------|------------------------------------------------------------|------------------------------------------------------------------------|
| Exchange-correlation                  | GGA                                                        | BLYP                                                                   |
| Integration accuracy                  | Grid                                                       | Fine                                                                   |
| SCF                                   | Tolerance<br>Multipolar expansion<br>Charge density mixing | $1.0 \times 10^{-5}$ eV/atom<br>Hexadecapole<br>Charge = 0.2, DIIS = 5 |
| Core treatment<br>Numerical basis set | All electron<br>DND<br>Global                              | Basis file 3.5<br>Fine                                                 |
| Solvation mode                        | COSMO                                                      | Water                                                                  |

**Table S2** Isotherm model parameters for Co<sup>2+</sup> adsorption on EDTA@PSV.

| Model                | Parameter | EDTA@PSV              | Unit                              |
|----------------------|-----------|-----------------------|-----------------------------------|
| Langmuir             | $q_m$     | 84.03                 | mg g <sup>-1</sup>                |
|                      | $K_L$     | $9.29 \times 10^{-3}$ | L mg <sup>-1</sup>                |
|                      | $R_L$     | 0.264                 |                                   |
|                      | $R^2$     | 0.991                 |                                   |
| Freundlich           | $K_F$     | 15.21                 | L mg <sup>-1</sup>                |
|                      | $n$       | 4.18                  |                                   |
|                      | $R^2$     | 0.699                 |                                   |
| Temkin               | $K_T$     | 14.76                 | L mg <sup>-1</sup>                |
|                      | $f$       | 0.199                 |                                   |
|                      | $R^2$     | 0.740                 |                                   |
| Dubinin-Radushkevich | $q_m$     | 137.70                | mg g <sup>-1</sup>                |
|                      | $K_{DR}$  | $2.71 \times 10^{-3}$ | mol <sup>2</sup> kJ <sup>-2</sup> |
|                      | $E$       | 13.58                 | kJ mol <sup>-1</sup>              |
|                      | $R^2$     | 0.735                 |                                   |

In Table S2, the mean adsorption energy ( $E$ ) obtained by using the Dubinin-Radushkevich model for the adsorption isotherm fitting relates to  $K_{DR}$  according to Eq. (S1).

$$E = 1/\sqrt{2K_{DR}} \quad (S1)$$

## Supplementary Figures

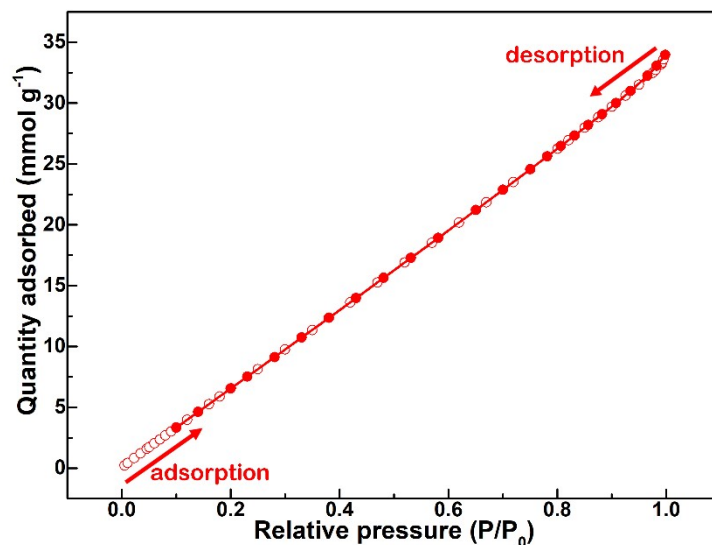

Figure S1 N<sub>2</sub> adsorption/desorption isotherms of @PSV.

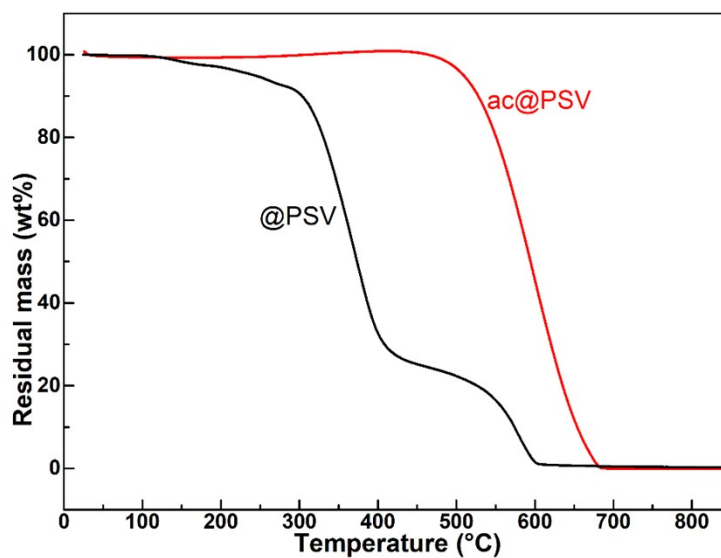

Figure S2 TGA curves of @PSV and ac@PSV.

After treatment with warm and concentrated H<sub>2</sub>SO<sub>4(aq)</sub>, the resulting ac@PSV shows improved thermal stability. It remains stable without degradation up to 500°C, whereas @PSV starts to degrade below 200°C.

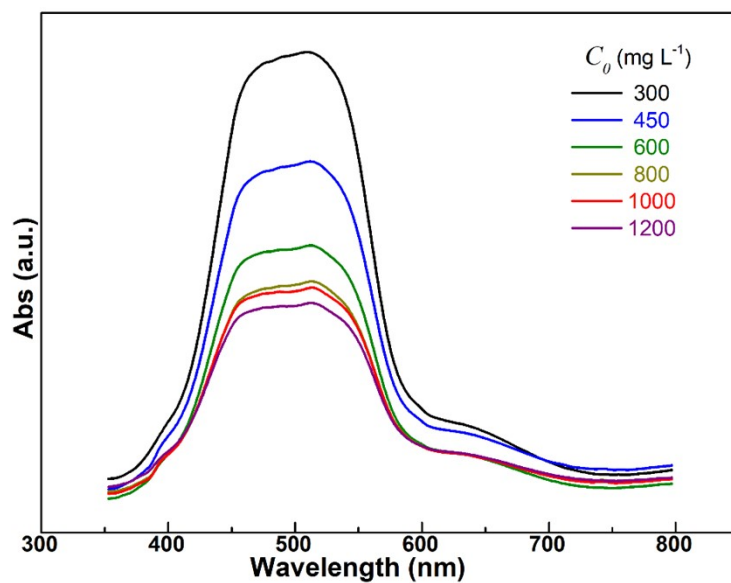

**Figure S3** The UV-Vis absorption spectra of  $\text{Co}^{2+}$  in aqueous solutions with varying initial concentrations ( $C_0$ ) at pH 6 and a temperature of  $25^\circ\text{C}$ .

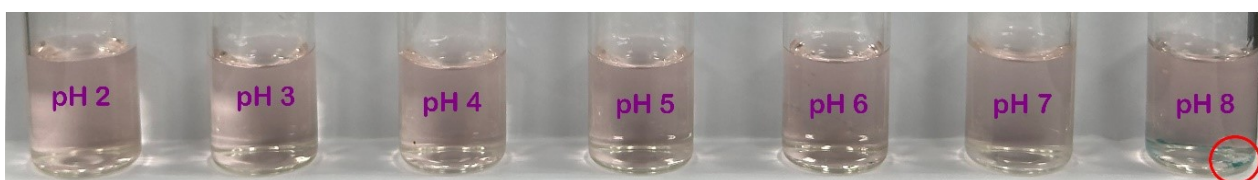

**Figure S4** A solubility test for  $\text{Co}^{2+}$  in aqueous solutions at  $25^\circ\text{C}$  with varying pH values.

Figure S4 demonstrates that the  $\text{Co}^{2+}$  solution remains clear until the pH reaches 8, where a precipitate forms (circled) due to the precipitation reaction below:

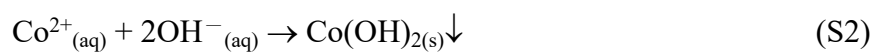

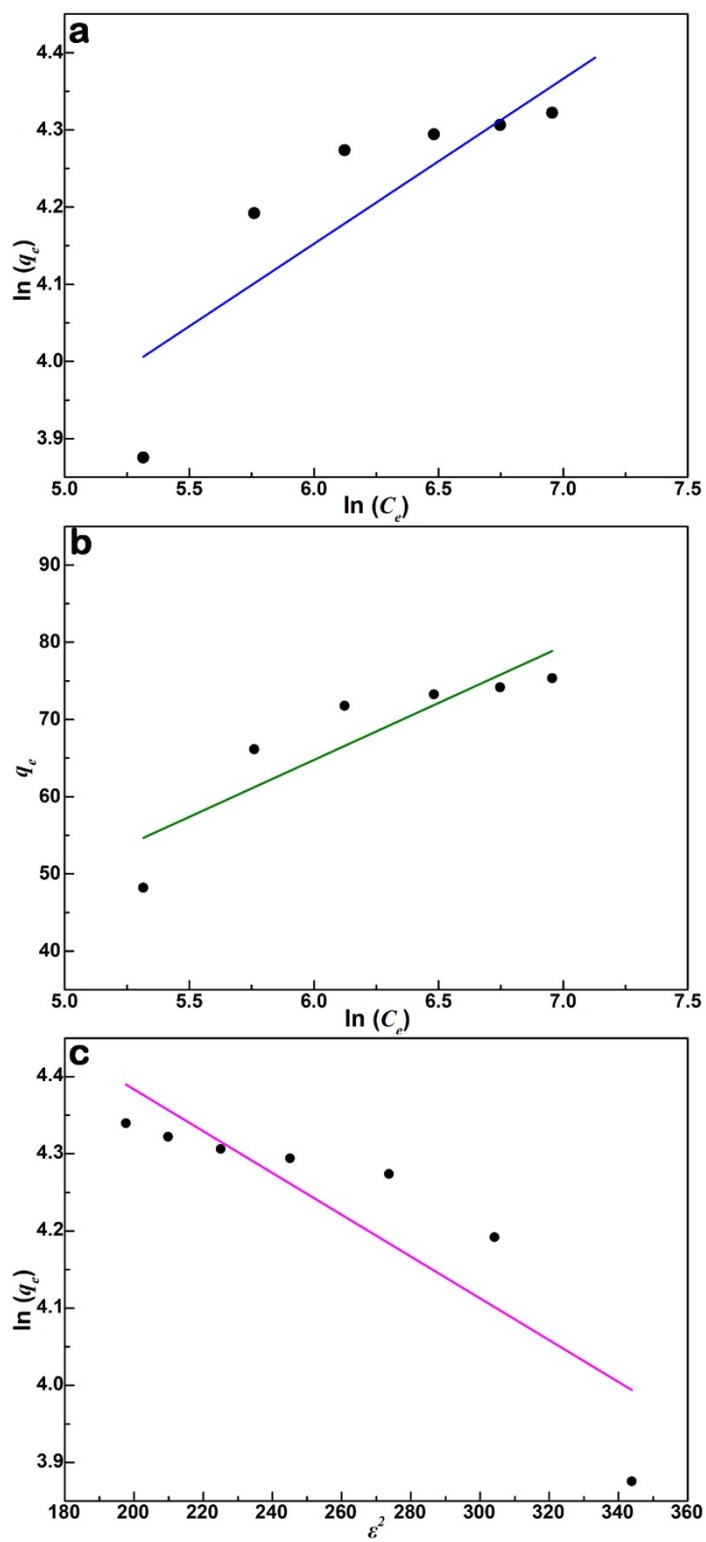

**Figure S5** (a) Freundlich, (b) Temkin, and (c) Dubinin-Radushkevich isotherm linear plots for  $\text{Co}^{2+}$  adsorption on EDTA@PSV.

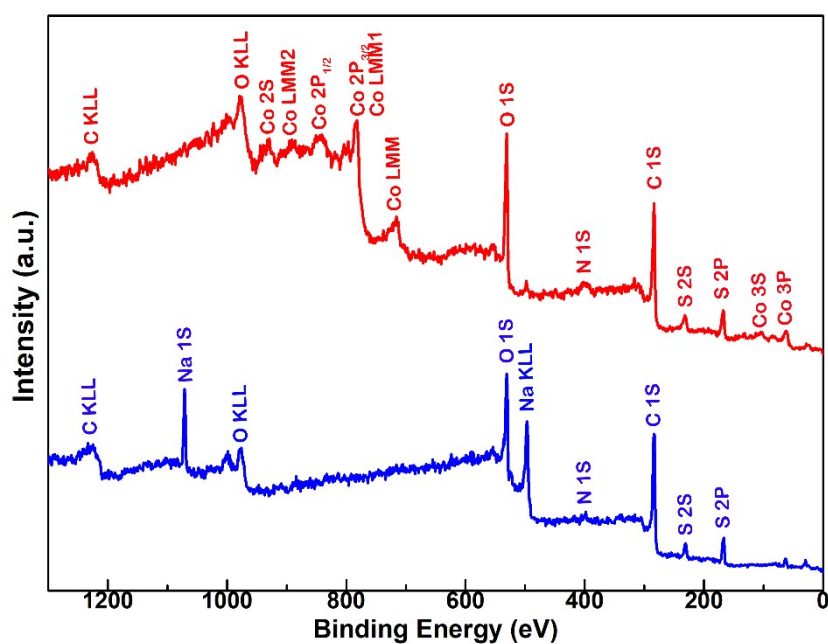

**Figure S6** XPS spectra of EDTA@PSV before (blue) and after (red)  $\text{Co}^{2+}$  adsorption.

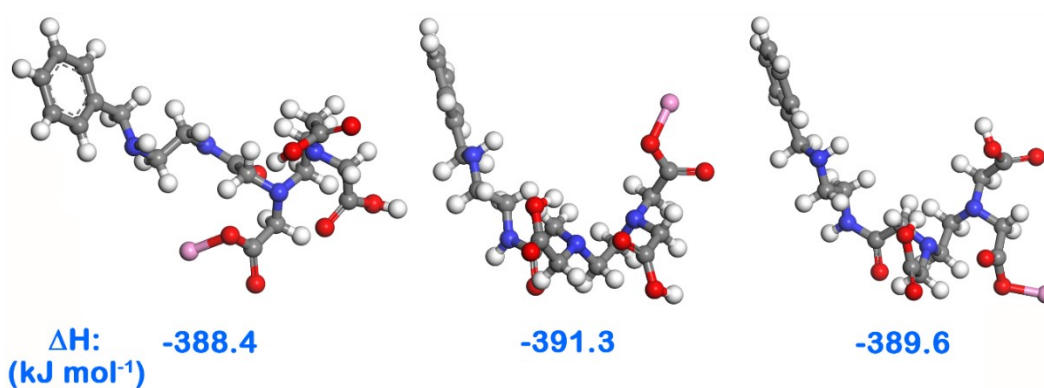

**Figure S7** Optimized structures of the complexes formed from  $\text{Co}^{2+}$  interacting with three different -COOH groups of EDTA on EDTA@PSV, along with their corresponding formation energies indicated.
